# Supplementary material for: Shaping of CD56bri Natural Killer Cells in Patients With Steroid-Refractory/Resistant Acute Graft-vs.-Host Disease via Extracorporeal Photopheresis
Source: Front Immunol. 2019 Mar 20;10:547. doi: 10.3389/fimmu.2019.00547 (PMC6436423; doi:10.3389/fimmu.2019.00547)
Supplement: Supplementary Table 1 — Antibody list. [file Table_1.docx]

Supplementary Material

Shaping of CD56bri natural killer cells in patients with steroid-refractory/resistant acute graft-versus-host disease via extracorporeal photopheresis

Ming Ni1,2Ϯ, Lei Wang1Ϯ, Mingya Yang1, Brigitte Neuber1, Leopold Sellner1, Angela Hückelhoven-Krauss1, Maria-Luisa Schubert1, Thomas Luft1, Ute Hegenbart1, Stefan Schönland1, Patrick Wuchter3, Bao-an Chen4, Volker Eckstein1, William Krüger5, Ronit Yerushalmi6, Katia Beider6, Arnon Nagler6, Carsten Müller-Tidow1, Peter Dreger1, Michael Schmitt1, Anita Schmitt1*

Ϯ Both authors contributed equally to this work.

1Department of Internal Medicine V, University Clinic Heidelberg, Heidelberg, Germany.

2Department of Hematology, the Affiliated Hospital of Guizhou Medical University, Guizhou, China.

3German Red Cross Blood Service, Medical Faculty Mannheim, Institute of Transfusion Medicine and Immunology Mannheim, Mannheim, Germany.

4Department of Hematology, Zhongda Hospital, Southeast University, Nanjing, China.

5Department of Internal Medicine C, Haematology, Oncology, Stem Cell Transplantation, Palliative Care, University Clinic Greifswald, Greifswald, Germany.

6Hematology Division, Chaim Sheba Medical Center, Tel Hashomer, Israel.

***Correspondence:**PD Dr. med. Anita Schmitt
[anita.schmitt@med.uni-heidelberg.de](mailto:anita.schmitt@med.uni-heidelberg.de)

# Supplementary Table 1. Antibody list.

| **Name** | **Dye** | **Isotype** | **Clone** | **VWorking (μl)** | **Company** | **Cat.NO.** |
| --- | --- | --- | --- | --- | --- | --- |
| CD3 | PE/Dazzle 594 | Mouse IgG2a, κ | HIT3a | 2 | Biolegend | 300336 |
| CD3 | BV510 | Mouse IgG1, κ | UCHT1 | 1 | Biolegend | 300448 |
| CD4 | PE | Mouse IgG2b, κ | OKT4 | 1 | Biolegend | 317410 |
| CD8 | PerCP | Mouse IgG1, κ | SK1 | 0.5 | Biolegend | 344708 |
| CD11b | BV510 | Mouse IgG1, κ | ICRF44 | 2 | BD | 563088 |
| CD14 | APC-eFluor780 | Mouse IgG1, κ | 61D3 | 2 | Thermo Fisher | 47-0149-42 |
| CD14 | PerCP | Mouse IgG1, κ | HCD14 | 2 | Biolegend | 325632 |
| CD16 | APC-Cy7 | Mouse IgG1, κ | 3G8 | 4 | Biolegend | 302018 |
| CD19 | PerCP | Mouse IgG1, κ | HIB19 | 2 | Biolegend | 302228 |
| CD19 | APC-Cy7 | Mouse IgG1, κ | HIB19 | 2 | Biolegend | 302218 |
| CD27 | PE-Cy7 | Mouse IgG1, κ | M-T271 | 2 | Biolegend | 356412 |
| CD56 | APC | Mouse IgG1, κ | HCD56 | 3 | Biolegend | 318309 |
| CD57 | Pacific Blue | Mouse IgM, κ | HCD57 | 1 | Biolegend | 322316 |
| CD62L | eFluor 450 | Mouse IgG1, κ | DREG56 | 3 | Thermo Fisher | 48-0629-42 |
| CD107a | FITC | Mouse IgG1, κ | H4A3 | 10 | BD | 560949 |
| CD159c (NKG2C) | PE | Mouse IgG1, κ | 134591 | 5 | r&d systems | FAB138P |
| CD314 (NKG2D) | PE | Mouse IgG1, κ | 1D11 | 1 | BD | 557940 |
| IFN-γ | PE | Mouse IgG1, κ | B27 | 1 | BD | 554701 |
| TNF-α | BV421 | Mouse IgG1, κ | MAb11 | 1 | BD | 562783 |

Abbreviations: Vworking = working volume of the respective antibody; Cat. No. = catalogue number; PE = phycoerythrin; BV = Brilliant Violet; PerCP = peridinin chlorophyll; APC = allophycocyanin; APC-Cy7 = allophycocyanin-Cyanin 7; PE-Cy7 = phycoerythrin-Cyanin 7. IFN-γ = Interferon-γ; TNF-α = Tumor necrosis factor-α; FITC = Fluorescein isothiocyanate.
